# Supplementary material for: Meta-epidemiology
Source: PubMed Central journal article supplement (PMC4220603; doi:10.4178/epih/e2014019), 2014-09-25
Supplement: epih-36-e2014019-supplementary.pdf [file epih-36-e2014019-supplementary.pdf]

1  
2  
3  
4  
5  
6  
7

<방법론>

메타역학

Meta-Epidemiology

Epidemiology and Health

8  
9  
10  
11  
12  
13  
14  
15  
16  
17  
18  
19  
20  
21  
22  
23

## Abstract

The concept of meta-epidemiology has been introduced with considering the methodological limitations of systematic review for intervention trials. The paradigm of meta-epidemiology has shifted from a statistical method into a new methodology to close gaps between evidence and practice. Main interest of meta-epidemiology is to control potential biases in previous quantitative systematic reviews and draw appropriate evidences for establishing evidence-base guidelines. Nowadays, the network meta-epidemiology was suggested in order to overcome some limitations of meta-epidemiology. To activate meta-epidemiologic studies, implementation of tools for risk of bias and reporting guidelines such as the Consolidated Standards for Reporting Trials (CONSORT) should be done.

Key words: Review literature as topic, Meta-analysis as topic, Bias, Epidemiology

24

## 25 1. 서론

26

27 보건의료서비스 제공에 있어 최선의 의사결정 판단을 하려는 움직임은 근거중심의  
28 학 (Evidence-based medicine), 근거중심 지침 (Evidence-based guideline), 근거중심 보건정  
29 책 (Evidence-based Health Policy) 등의 새로운 학문 영역들이 등장하게 되었다 [1]. 그리고  
30 학문적 개척을 위하여 기존에 만들어진 (generation) 근거들을 체계적으로 수집하고 평가하  
31 여, 보다 타당하고 유용한 근거로 합성 (synthesis)하려는 움직임에 체계적 고찰 (systematic  
32  review, SR)란 새로운 연구방법론이 제시되었다 [2-5].

33

34 특히 심근경색환자에 있어 베타차단제 투여 여부의 결정에 있어 SR 방법론을 적용  
35 하여 논란을 잠재운 경험을 하면서 [6], 현재는 약물 혹은 시술 등의 새로운 개입  
36 (intervention)의 효능 (efficacy)를 알아보는 무작위배정 비교임상시험 (Randomized-  
37 controlled clinical trials, RCT)과 관련하여 발표한 원 논문 (original article, OA)들에 관한 체  
38 계적 고찰 연구방법론은 확립된 상황이다 [7,8].

39

40 그러나  메타분석의 연구대상은 OA라는 점에서, OA가 갖는 근본적인 한계 때문에  
41 SR 방법론으로 이를 극복하는 데는 한계가 있다는 주장이 개발 당시부터 제기되어 왔다 [4,  
42 9-13]. SR을 둘러싼 그동안의 장단점에 대한 주장들을 Noble [5]은 정리해서 제시하였다. 이  
43 런 한계들을 극복하려는 돌파구의 하나로 메타역학 (Meta-Epidemiology)이란 신조어가 제  
44 시된 것이다 [14]. 이런 흐름에 있어 메타역학이 대두한 배경, 정의와 목적, 그리고 실제 적  
45 용한 연구 성과들을 살펴보고자 한다.

46

## 47 2. 본론: 메타역학의 개론

48

49            가. 메타역학 대두 배경

50

51            SR을 적용한 논문들이 활발히 발표되는 가운데, 같은 연구가설을 가진 SR들 간에도  
52 상이한 결과가 도출되거나, OA 자체가 가진 치명적 한계로 SR 추론에 대한 문제가 제기되  
53 는 상황이 연출되기 시작하였다 [15-19]. SR 연구 수행 과정에서 발생할 수 있는 오류들인  
54 이질성 (heterogeneity) 통제 [20,21], 출판 오류 (publication bias) [9, 22-24], 결과보고 오류  
55 (outcome reporting bias) [25-27] 등도 문제가 되겠지만, RCT 연구 수행상 문제가 되는 대상  
56 자 배정과정의 숨김 (allocation concealment) 이나 배정후 환자의 눈가림법 (blinding) 등의  
57 근본적인 방법론상 문제로 인하여 SR 결과 추론을 어렵게 만든다는 주장들이 제기되어 왔  
58 다 [18, 28-35].

59

60            이에 따라 SR 수행시 연구대상이 된 OA의 질적 수준을 보다 엄격히 평가해서, 특  
61 정 항목의 평가 결과에 따라 메타분석을 달리 적용해 보려는 시도들이 있었다 [30, 36-39].  
62 특히 배정과정 숨김과 배정후 눈가림법이 2000년을 들어서면서 개념 분리와 정립이 이루어  
63 지면서 [40,41], 계획서에 이를 반영하지 않고 수행된 RCT들을 연구대상으로 삼은 SR에 있  
64 어 연구결과의 타당성을 확인하려는 움직임이 본격화되었다 [18, 27, 30, 37, 42-45]. 이런 배  
65 경에서 mega-regression [4, 46-48], imputation [15], Informative missing odds ratio [26, 49],  
66 two statistical model [33] 등의 다양한 시도들이 있었으며, 메타역학이란 용어가 제기된 것  
67 이다 [14, 16, 36, 50].

68

69

70            나. 메타역학의 정의와 목적

71

72            Zhang [14]에 따르면, 메타역학이란 용어가 문헌에 처음으로 등장한 것은 1997년  
73 David Naylor의 편집자 논평이라고 한다 [50]. 2002년 Sterne et al. [16] 이 RCT의 질적 문제

74 가 어떤 영향을 미치는 가를 알아보기 위한 '통계학적 방법'이라고 한정적인 의미를 부여하  
75 였다. 그러나 지금은 교란변수들을 통제하는 전통 역학연구방법론처럼, 메타 교란변수  
76 (meta-confounders)를 통제하는 또 하나의 역학연구방법론으로 정립하고 있는 중에 있다  
77 [14, 30, 51]. 여기서 전통역학과는 차이점이라면, 기존의 전통역학의 연구 대상이 개별 사람  
78 이라면, 메타역학의 연구대상은 RCT 수행결과를 발표한 OA인 것이다.

79  
80 메타역학은 epidemiology와 meta-analysis 의 두 개념이 합쳐 만들어진 것으로, 이  
81 들의 목적에 맞추어 메타역학은 다음 3가지를 지향하고 있다 [14]. (1) 특정 연구가설에 따  
82 른 근거들의 분포를 살펴보며 (to describe distribution of research evidences for a specific  
83 question) (2) 이질성 여부와 이를 야기시킨 요소들을 알아내고 (to examine heterogeneity  
84 and associated risk factors) (3) 연구들 간의 개입된 오류들을 확인 통제하여 최적화된 종합  
85 적 근거를 도출하려는 것이다 (to control bias across studies and summarize research  
86 evidence as appropriate).

87  
88

#### 89 다. 메타역학의 실제 적용 사례

90  
91 지금까지 논문 제목이나, 연구방법론에 메타역학이란 용어를 제시하고 발표한 논문  
92 들을 연도별로 정리한 것이 Appendix 이다. 본격적으로 메타역학을 적용한 결과 발표는  
93 2008년 이후이며, 초기에는 배정과정 숨김과 배정 후 눈가림법의 영향을 통제하려는 연구  
94 가 수행되었다 [30, 32]. 그 한 예로 Wood et al. [30]는 기존에 발표된 146개의 메타분석 대  
95 상인 1,346개 임상시험 논문들을 배정과정 숨김과 배정 후 눈가림법 여부에 따라 다시 나  
96 누어 재 분석을 했을 때, 이들의 항목이 제대로 지켜지지 않은 경우에서 주관적 효과 평가  
97 가 과장됨을 보여주었다. 최근으로 올수록 유전자형 [52], 연구설계 [36, 53], 대상자 수 [54]

98 같이 다양한 잠재적인 메타교란변수들 (potential meta-confounders)을 적용하고 있는 흐름  
99 을 알 수 있다.

100

101

102 라. 메타메타역학 (meta-meta-epidemiology)과 망메타역학 (Network meta-  
103 epidemiology)

104

105 앞서 메타역학이 제기된 배경에서 보듯이, 다양한 SR 결과를 제어하기 위하여 메타  
106 역학이 생겨났다면, 메타역학의 결과가 다양하다면 이를 제어하기 위하여 메타-메타역학이  
107 란 용어가 제기될 수 있다 [55].

108

109 한편, 메타역학은 몇 가지 한계를 가지고 있다 [47, 55, 56]. 첫째로 분석이 가능한  
110 연구 결과는 이분형이어서 연속형 결과들을 다룰 수 없으며, 둘째로 대상이 되는 논문들의  
111 숫자가 줄어들어 통계적 검정력에서 제한이 생기고, 셋째로 간접비교 (indirect comparison)  
112 을 적용할 수 없다는 것이다. 이런 제한들을 극복하려는 취지에서 Chiamani et al [47]는 망  
113 메타역학 (network meta-epidemiology)란 용어를 제시하였다. 특히 개입의 종류를 여러 개  
114 로 한 경우의 직간접 비교를 한다는 점을 강조하는 mixed treatment comparison meta-  
115 analysis 란 용어로도 제시되었다 [7, 46]. 이를 수행하기 위하여, 연구수행 도구 [57,58],  
116 Copas parametric model [59,60], 제시하는 그래프 [61], 발표 항목 [62] 등의 개발 등이 현  
117 재 진행 중에 있다.

118

119 이상과 같이 메타역학에서 파생한 메타메타역학과 망메타역학의 개념을 잘 구분짓  
120 도록 Trinquart et al [55]는 상호비교한 표를 제시하였다.

121

122

123 3. 결어 및 제언

124

125           타당한 SR 결과가 있어야만, 좋은 임상진료지침이 만들어 지며, 결국 보건의료 전체의  
126 질 향상에 기여할 수 있다. 메타역학이 제기된 배경과 지향하는 목적도 바로 이것이다. 올바른  
127 SR 결과 도출을 위해서는 SR의 분석대상이 되는 RCT의 질을 향상시켜야 하는 것이 핵심  
128 적인 과제가 된다 [36, 63]. 이를 위하여 몇 가지 제언을 하고 마치고자 한다.

129

130           첫째, 오류가 발생할 수 있는 위험을 제대로 평가하는 질 평가 표준 도구 개발 및 보급  
131 이 필요하다 [64]. 코크란 연합회에서는 RoB (risk of bias)란 도구를 제시하고 있는데 [65-67],  
132 이러한 도구를 활용하여 SR 추론에 어떤 영향을 미치는가를 알아보는 메타역학 연구의 활  
133 성화가 필요하다 [36].

134

135           둘째, RCT의 질 평가에 적용하는 용어들의 개념을 보다 분명히 정립할 필요가 있다  
136 [68]. 배정과정 숨기기와 배정후 눈가림법 같은 개념들은 기존의 연구방법 교과서 뿐만 아니  
137 라, 연구 수행자들에게도 통일되게 수정 보급되어야 하기 때문이다.

138

139           셋째, RCT의 연구결과를 SR에서 제대로 확인하고 해석하기 위해서는 정해진 항목들을  
140 빠뜨리지 않고 보고해야 한다 [35]. The Consolidated Standards for Reporting Trials  
141 (CONSORT) 보고 지침에 따른 경우 논문의 질적 향상에 도움이 된다는 보고가 있어 [69,70],  
142 RCT 연구자들은 이를 가능한 준수하는 것이 필요하다.

143

144           넷째, 애초 계획서와 보고한 결과 보고서와는 차이가 있다는 사실이 부각되면서 [71],  
145 연구수행 직전에 공개적인 곳에 등록하여 연구결과가 누락되지 않도록 하자는 국제적인 움  
146 직임이 있다. 출판오류도 줄일 수 있다는 장점 [24]도 있어 세계적 추세에 맞추어 이를 적극

147       수용하는 것이 필요하다.

148

149

150   **감사의 글**

151

152   이 논문은 2014학년도 제주대학교 학술진흥연구비 지원사업에 의하여 연구되었음

153

Epidemiology and Health



154 **References**

155

156 1. Bae JM, Park BJ, Ahn YO. Perspectives of clinical epidemiology in Korea. J Korean Med Assoc 2013;56:718-  
157 723. (korean)

158 2. Ioannidis JP, Schmid CH, Lau J. Meta-analysis in hematology and oncology. Hematol Oncol Clin North Am  
159 2000;14:973-991.

160 3. Ahn HS, Kim HJ. An introduction to systematic review. J Korean Med Assoc 2014;57:49-59. (korean)

161 4. Khoshdel A, Attia J, Carney SL. Basic concepts in meta-analysis: A primer for clinicians. Int J Clin Pract  
162 2006;60:1287-1294.

163 5. Noble JH Jr. Meta-analysis: Methods, strengths, weaknesses, and political uses. J Lab Clin Med 2006;147:7-  
164 20.

165 6. Freemantle N, Cleland J, Young P, Mason J, Harrison J. beta Blockade after myocardial infarction:  
166 systematic review and meta regression analysis. BMJ 1999;318:1730-1737.

167 7. Salanti G, Higgins JP, Ades AE, Ioannidis JP. Evaluation of networks of randomized trials. Stat Methods  
168 Med Res 2008;17:279-301.

169 8. Bae JM. Methodological issues for Systematic Reviews of Diagnostic Tests Assessments. Epidemiol  
170 Health 2014. (in press) (korean) 

171 9. Egger M, Smith GD, Sterne JA. Uses and abuses of meta-analysis. Clin Med 2001;1:478-484.

172 10. Stevens KR, Ledbetter CA. Basics of evidence-based practice. Part 1: The nature of the evidence. Semin  
173 Perioper Nurs 2000;9:91-97.

174 11. Michels KB. Quo vadis meta-analysis? A potentially dangerous tool if used without adequate rules.  
175 Important Adv Oncol 1992:243-8.

176 12. Finckh A, Tramèr MR. Primer: strengths and weaknesses of meta-analysis. Nat Clin Pract Rheumatol  
177 2008;4:146-1452.

178 13. Morris RD. Meta-analysis in cancer epidemiology. Environ Health Perspect 1994;102 Suppl 8:61-66.

179 14. Zhang W. Meta-epidemiology: building the bridge from research evidence to clinical practice.

- 180 Osteoarthritis Cartilage 2010;18 Suppl 2:S1.
- 181 15. Robertson C, Idris NR, Boyle P. Beyond classical meta-analysis: can inadequately reported studies be  
182 included? *Drug Discov Today* 2004;9:924-931.
- 183 16. Sterne JA, Juni P, Schulz KF, Altman DG, Bartlett C, Egger M. Statistical methods for assessing the  
184 influence of study characteristics on treatment effects in 'meta-epidemiological' research. *Stat Med*  
185 2002;21:1513-1524.
- 186 17. Olsen O, Gøtzsche PC. Cochrane review on screening for breast cancer with mammography. *Lancet*.  
187 2001;358:1340-1342.
- 188 18. Schulz KF, Chalmers I, Hayes RJ, Altman DG. Empirical evidence of bias. Dimensions of methodological  
189 quality associated with estimates of treatment effects in controlled trials. *JAMA* 1995;273:408-412.
- 190 19. Gluud LL. Bias in clinical intervention research. *Am J Epidemiol* 2006;163:493-501.
- 191 20. Ioannidis JP. Interpretation of tests of heterogeneity and bias in meta-analysis. *J Eval Clin Pract*  
192 2008;14:951-957.
- 193 21. Turner RM, Davey J, Clarke MJ, Thompson SG, Higgins JP. Predicting the extent of heterogeneity in meta-  
194 analysis, using empirical data from the Cochrane Database of Systematic Reviews. *Int J Epidemiol*  
195 2012;41:818-827.
- 196 22. Hopewell S, Loudon K, Clarke MJ, Oxman AD, Dickersin K. Publication bias in clinical trials due to  
197 statistical significance or direction of trial results. *Cochrane Database Syst Rev* 2009;(1):MR000006.
- 198 23. Mahid SS, Qadan M, Hornung CA, Galandiuk S. Assessment of publication bias for the surgeon scientist.  
199 *Br J Surg* 2008;95:943-949.
- 200 24. Thornton A, Lee P. Publication bias in meta-analysis: its causes and consequences. *J Clin Epidemiol*  
201 2000;53:207-216.
- 202 25. Kirkham JJ, Dwan KM, Altman DG, Gamble C, Dodd S, Smyth R, et al. The impact of outcome reporting  
203 bias in randomised controlled trials on a cohort of systematic reviews. *BMJ* 2010;340:c365.
- 204 26. White IR, Welton NJ, Wood AM, Ades AE, Higgins JP. Allowing for uncertainty due to missing data in

- 205 meta-analysis--part 2: hierarchical models. *Stat Med* 2008;27:728-745.
- 206 27. Savović J, Jones HE, Altman DG, Harris RJ, Jüni P, Pildal J, et al. Influence of reported study design  
207 characteristics on intervention effect estimates from randomized, controlled trials. *Ann Intern Med*  
208 2012;157:429-438.
- 209 28. Jüni P, Altman DG, Egger M. Systematic reviews in health care: Assessing the quality of controlled clinical  
210 trials. *BMJ* 2001;323:42-46.
- 211 29. Hróbjartsson A, Thomsen AS, Emanuelsson F, Tendal B, Hilden J, Boutron I, et al. Observer bias in  
212 randomised clinical trials with binary outcomes: systematic review of trials with both blinded and non-  
213 blinded outcome assessors. *BMJ* 2012;344:e1119.
- 214 30. Wood L, Egger M, Gluud LL, Schulz KF, Jüni P, Altman DG, et al. Empirical evidence of bias in treatment  
215 effect estimates in controlled trials with different interventions and outcomes: meta-epidemiological  
216 study. *BMJ* 2008;336:601-605.
- 217 31. Nüesch E, Trelle S, Reichenbach S, Rutjes AW, Bürgi E, Scherer M, et al. The effects of excluding patients  
218 from the analysis in randomised controlled trials: meta-epidemiological study. *BMJ* 2009;339:b3244.
- 219 32. Nüesch E, Reichenbach S, Trelle S, Rutjes AW, Liewald K, Sterchi R, et al. The importance of allocation  
220 concealment and patient blinding in osteoarthritis trials: a meta-epidemiologic study. *Arthritis Rheum*  
221 2009;61:1633-1641.
- 222 33. Siersma V, Als-Nielsen B, Chen W, Hilden J, Gluud LL, Gluud C.. Multivariable modelling for meta-  
223 epidemiological assessment of the association between trial quality and treatment effects estimated in  
224 randomized clinical trials. *Stat Med* 2007;26:2745-2758.
- 225 34. Montori VM, Bhandari M, Devereaux PJ, Manns BJ, Ghali WA, Guyatt GH. In the dark: the reporting of  
226 blinding status in randomized controlled trials. *J Clin Epidemiol* 2002;55:787-790.
- 227 35. Kjaergard LL, Villumsen J, Gluud C. Reported methodologic quality and discrepancies between large and  
228 small randomized trials in meta-analyses. *Ann Intern Med* 2001;135:982-989.
- 229 36. Savović J, Jones H, Altman D, Harris R, Jüni P, Pildal J, et al. Influence of reported study design

230 characteristics on intervention effect estimates from randomised controlled trials: combined analysis of  
231 meta-epidemiological studies. *Health Technol Assess* 2012;16:1-82.

232 37. Moher D, Pham B, Jones A, Cook DJ, Jadad AR, Moher M, et al. Does quality of reports of randomised  
233 trials affect estimates of intervention efficacy reported in meta-analyses? *Lancet* 1998;352:609-613.

234 38. Balk EM, Bonis PA, Moskowitz H, Schmid CH, Ioannidis JP, Wang C, et al. Correlation of quality measures  
235 with estimates of treatment effect in meta-analyses of randomized controlled trials. *JAMA* 2002;287:2973-  
236 2982.

237 39. Jackson R, Ameratunga S, Broad J, Connor J, Lethaby A, Robb G, et al. The GATE frame: critical appraisal  
238 with pictures. *Evid Based Med* 2006;11:35-38.

239 40. Altman DG, Schulz KF. Statistics notes: Concealing treatment allocation in randomised trials. *BMJ*  
240 2001;323:446-447.

241 41. Pildal J, Chan AW, Hróbjartsson A, Forfang E, Altman DG, Gøtzsche PC. Comparison of descriptions of  
242 allocation concealment in trial protocols and the published reports: cohort study. *BMJ* 2005;330:1049.

243 42. Pildal J, Hróbjartsson A, Jørgensen KJ, Hilden J, Altman DG, Gøtzsche PC. Impact of allocation  
244 concealment on conclusions drawn from meta-analyses of randomized trials. *Int J Epidemiol* 2007;36:847-  
245 857.

246 43. Schulz KF. Assessing allocation concealment and blinding in randomized controlled trials: why bother?  
247 *ACP J Club* 2000;132:A11-A12.

248 44. Hróbjartsson A, Pildal J, Chan AW, Haahr MT, Altman DG, Gøtzsche PC. Reporting on blinding in trial  
249 protocols and corresponding publications was often inadequate but rarely contradictory. *J Clin Epidemiol*  
250 2009;62:967-973.

251 45. Egger M, Juni P, Bartlett C, Holenstein F, Sterne J. How important are comprehensive literature searches  
252 and the assessment of trial quality in systematic reviews? Empirical study. *Health Technol Assess* 2003;7:1-  
253 76.

254 46. Salanti G, Dias S, Welton NJ, Ades AE, Golfinopoulos V, Kyrgiou M, et al. Evaluating novel agent effects in

- 255 multiple-treatments meta-regression. *Stat Med* 2010;29:2369-2383.
- 256 47. Chaimani A, Vasiliadis HS, Pandis N, Schmid CH, Welton NJ, Salanti G. Effects of study precision and risk  
257 of bias in networks of interventions: a network meta-epidemiological study. *Int J Epidemiol* 2013;42:1120-  
258 1131.
- 259 48. Rücker G, Carpenter JR, Schwarzer G. Detecting and adjusting for small-study effects in meta-analysis.  
260 *Biom J* 2011;53:351-368.
- 261 49. Lyles RH, Allen AS, Dana Flanders W, Kupper LL, Christensen DL. Inference for case-control studies when  
262 exposure status is both informatively missing and misclassified. *Stat Med* 2006;25:4065-4080.
- 263 50. Naylor CD. Meta-analysis and the meta-epidemiology of clinical research. *BMJ* 1997;315:617-619.
- 264 51. Le Lorier J, Grégoire G. Meta-analysis and the meta-epidemiology of clinical research. Comments on  
265 paper by author of editorial were unwarranted. *BMJ* 1998;316:311-312.
- 266 52. Valdes AM, Arden NK, Tamm A, Kisand K, Doherty S, Pola E, et al. A meta-analysis of interleukin-6  
267 promoter polymorphisms on risk of hip and knee osteoarthritis. *Osteoarthritis Cartilage* 2010;18:699-704.
- 268 53. Tzoulaki I, Siontis KC, Ioannidis JP. Prognostic effect size of cardiovascular biomarkers in datasets from  
269 observational studies versus randomised trials: meta-epidemiology study. *BMJ* 2011;343:d6829.
- 270 54. Dechartres A, Trinquart L, Boutron I, Ravaud P. Influence of trial sample size on treatment effect  
271 estimates: meta-epidemiological study. *BMJ* 2013;346:f2304.
- 272 55. Trinquart L, Dechartres A, Ravaud P. Commentary: Meta-epidemiology, meta-meta-epidemiology or  
273 network meta-epidemiology? *Int J Epidemiol* 2013;42:1131-1133.
- 274 56. Veroniki AA, Vasiliadis HS, Higgins JP, Salanti G. Evaluation of inconsistency in networks of interventions.  
275 *Int J Epidemiol* 2013;42:332-345.
- 276 57. Salanti G, Del Giovane C, Chaimani A, Caldwell DM, Higgins JP. Evaluating the quality of evidence from a  
277 network meta-analysis. *PLoS One* 2014;9:e99682.
- 278 58. Hutton B, Salanti G, Chaimani A, Caldwell DM, Schmid C, Thorlund K, et al. The quality of reporting  
279 methods and results in network meta-analyses: an overview of reviews and suggestions for improvement.

280 PLoS One 2014;9:e92508.

281 59. Mavridis D, Sutton A, Cipriani A, Salanti G. A fully Bayesian application of the Copas selection model for  
282 publication bias extended to network meta-analysis. *Stat Med* 2013;32:51-66.

283 60. Salanti G, Marinho V, Higgins JP. A case study of multiple-treatments meta-analysis demonstrates that  
284 covariates should be considered. *J Clin Epidemiol* 2009;62:857-864.

285 61. Chaimani A, Higgins JP, Mavridis D, Spyridonos P, Salanti G. Graphical tools for network meta-analysis in  
286 STATA. *PLoS One* 2013;8:e76654.

287 62. Bafeta A, Trinquart L, Seror R, Ravaud P. Analysis of the systematic reviews process in reports of network  
288 meta-analyses: methodological systematic review. *BMJ* 2013;347:f3675.

289 63. De Vito C, Manzoli L, Marzuillo C, Anastasi D, Boccia A, Villari P. A systematic review evaluating the  
290 potential for bias and the methodological quality of meta-analyses in vaccinology. *Vaccine* 2007;25:8794-  
291 8806.

292 64. Moja LP, Telaro E, D'Amico R, Moschetti I, Coe L, Liberati A. Assessment of methodological quality of  
293 primary studies by systematic reviews: results of the metaquality cross sectional study. *BMJ* 2005;330:1053.

294 65. Hartling L, Ospina M, Liang Y, Dryden DM, Hooton N, Krebs Seida J, et al. Risk of bias versus quality  
295 assessment of randomised controlled trials: cross sectional study. *BMJ* 2009;339:b4012.

296 66. Higgins JP, Altman DG, Gøtzsche PC, Jüni P, Moher D, Oxman AD, et al. The Cochrane Collaboration's  
297 tool for assessing risk of bias in randomised trials. *BMJ* 2011;343:d5928.

298 67. Schouten LM, Hulscher ME, van Everdingen JJ, Huijsman R, Grol RP. Evidence for the impact of quality  
299 improvement collaboratives: systematic review. *BMJ* 2008;336:1491-1494.

300 68. Devereaux PJ, Manns BJ, Ghali WA, Quan H, Lacchetti C, Montori VM, et al. Physician interpretations and  
301 textbook definitions of blinding terminology in randomized controlled trials. *JAMA* 2001;285:2000-2003.

302 69. Augestad KM, Berntsen G, Lassen K, Bellika JG, Wootton R, Lindsetmo RO, et al. Standards for reporting  
303 randomized controlled trials in medical informatics: a systematic review of CONSORT adherence in RCTs  
304 on clinical decision support. *J Am Med Inform Assoc* 2012;19:13-21.

305 70. Hopewell S, Dutton S, Yu LM, Chan AW, Altman DG. The quality of reports of randomised trials in 2000  
306 and 2006: comparative study of articles indexed in PubMed. *BMJ* 2010;340:c723.

307 71. Hill CL, LaValley MP, Felson DT. Discrepancy between published report and actual conduct of randomized  
308 clinical trials. *J Clin Epidemiol* 2002;55:783-786.

309

310

311 **Appendix. Examples of meta-epidemiologic studies**

312

| Studies*   | Meta-confounders                     |
|------------|--------------------------------------|
| A01 (2008) | concealment & blindness              |
| A02 (2008) | placebo control vs untreated control |
| A03 (2009) | concealment & blindness              |
| A04 (2009) | genetic polymorphism                 |
| A05 (2009) | exclusion of patients                |
| A06 (2010) | randomization & effect size          |
| A07 (2011) | single center vs multicenter         |
| A08 (2011) | concealment                          |
| A09 (2011) | experimental vs observational design |
| A10 (2012) | study design                         |
| A11 (2013) | sample size                          |

313 \* Reference number (publication year)

314 A01. Wood L, Egger M, Gluud LL, Schulz KF, Jüni P, Altman DG, et al. Empirical evidence of bias in treatment  
 315 effect estimates in controlled trials with different interventions and outcomes: meta-epidemiological  
 316 study. *BMJ* 2008;336:601-605.

317 A02. Zhang W, Robertson J, Jones AC, Dieppe PA, Doherty M. The placebo effect and its determinants in  
 318 osteoarthritis: meta-analysis of randomised controlled trials. *Ann Rheum Dis* 2008;67:1716-1723.

319 A03. Nüesch E, Reichenbach S, Trelle S, Rutjes AW, Liewald K, Sterchi R, et al. The importance of allocation  
 320 concealment and patient blinding in osteoarthritis trials: a meta-epidemiologic study. *Arthritis Rheum*



321 2009;61:1633-1641.

322 A04. Valdes AM, Arden NK, Tamm A, Kisand K, Doherty S, Pola E, et al. A meta-analysis of interleukin-6  
323 promoter polymorphisms on risk of hip and knee osteoarthritis. *Osteoarthritis Cartilage* 2010;18:699-704.

324 A05. Nüesch E, Trelle S, Reichenbach S, Rutjes AW, Bürgi E, Scherer M, et al. The effects of excluding patients  
325 from the analysis in randomised controlled trials: meta-epidemiological study. *BMJ* 2009;339:b3244.

326 A06. Oliver S, Bagnall AM, Thomas J, Shepherd J, Sowden A, White I, et al. Randomised controlled trials for  
327 policy interventions: a review of reviews and meta-regression. *Health Technol Assess* 2010;14:1-165.

328 A07. Dechartres A, Boutron I, Trinquart L, Charles P, Ravaud P. Single-center trials show larger treatment  
329 effects than multicenter trials: evidence from a meta-epidemiologic study. *Ann Intern Med* 2011;155:39-  
330 51.

331 A08. Herbison P, Hay-Smith J, Gillespie WJ. Different methods of allocation to groups in randomized trials  
332 are associated with different levels of bias. A meta-epidemiological study. *J Clin Epidemiol* 2011;64:1070-  
333 1075.

334 A09. Tzoulaki I, Siontis KC, Ioannidis JP. Prognostic effect size of cardiovascular biomarkers in datasets from  
335 observational studies versus randomised trials: meta-epidemiology study. *BMJ* 2011;343:d6829.

336 A10. Savović J, Jones H, Altman D, Harris R, Jūni P, Pildal J, et al. Influence of reported study design  
337 characteristics on intervention effect estimates from randomised controlled trials: combined analysis of  
338 meta-epidemiological studies. *Health Technol Assess* 2012;16:1-82.

339 A11. Dechartres A, Trinquart L, Boutron I, Ravaud P. Influence of trial sample size on treatment effect  
340 estimates: meta-epidemiological study. *BMJ* 2013;346:f2304.

341

## 초록

342  
343  
344 약물이나 시술 등의 개입에 관한 효과를 알아보는 임상시험을 대상으로 체계적 고  
345 찰을 수행하는 과정에서 한계점을 극복하기 위하여 '메타역학'이란 개념이 만들어졌다. 처  
346 음에는 통계적 방법론에서 시작했으나 지금은 근거-진료간의 간격을 메꾸는 새로운 연구방  
347 법론으로 자리잡게 되었다. 메타역학 방법론의 주된 목적은 기존의 체계적 고찰 결과의 오  
348 류를 알아보고, 근거바탕의 진료지침을 수립하는데 필요한 최적의 근거를 제공하는 것이다.  
349 그리고 메타역학의 한계점을 뛰어넘기 위하여 '망 메타역학'이란 개념도 제시되었다. 국내  
350 메타역학 연구의 활성화를 도모하기 위하여 메타분석 개념을 소개하고 발전 방안들을 제시  
351 하였다.

352
